# Supplementary material
Source: MDPI journal article supplement (https://www.mdpi.com/2073-4344/13/1/95)
Supplement: s1 [file s1]

## SUPPORTING INFORMATION

### Co-immobilization of D-Amino Acid Oxidase, Catalase and Transketolase for One-Pot, Two-Step Synthesis of L-Erythrulose

Daria Świętochowska 1,2, Aleksandra Łochowicz 1, Nazim Ocal 3, Loredano Pollegioni 4,  
Franck Charmantray 3, Laurence Hecquet 3, Katarzyna Szymańska 5,\*

- 1 Department of Organic Chemistry, Bioorganic Chemistry and Biotechnology, Silesian University of Technology, 44-100 Gliwice, Poland
- 2 Biotechnology Center, Silesian University of Technology, B. Krzywoustego 8, 44-100 Gliwice, Poland
- 3 Université Clermont Auvergne, CNRS, SIGMA Clermont, Institut de Chimie de Clermont-Ferrand (ICCF) F-63000 Clermont-Ferrand, France
- 4 Department of Biotechnology and Life Sciences, Università degli Studi dell'Insubria, 21100 Varese, Italy
- 5 Department of Chemical Engineering and Process Design, Silesian University of Technology, 44-100 Gliwice, Poland

\* Correspondence: katarzyna.szymanska@polsl.pl (K.S.)

#### Table of Contents:

**Table S1.** Structure parameters of silica monolithic beads before and after functionalization with amino groups

**Figure S1.** Long-term thermal stability of free and immobilized DAAO<sub>Rg</sub> and TK<sub>gst</sub>.

**Table S1.** Structure parameters of silica monolithic beads before and after functionalization with amino groups. Data from low temperature nitrogen adsorption.

|      | $S_{\text{BET}}$ [ $\text{m}^2/\text{g}$ ] | $V_p$ [ $\text{cm}^3/\text{g}$ ] | $d_p$ [nm] |
|------|--------------------------------------------|----------------------------------|------------|
| MH   | 290                                        | 1.23                             | 18.5       |
| MH-A | 155                                        | 0.85                             | 17.5       |

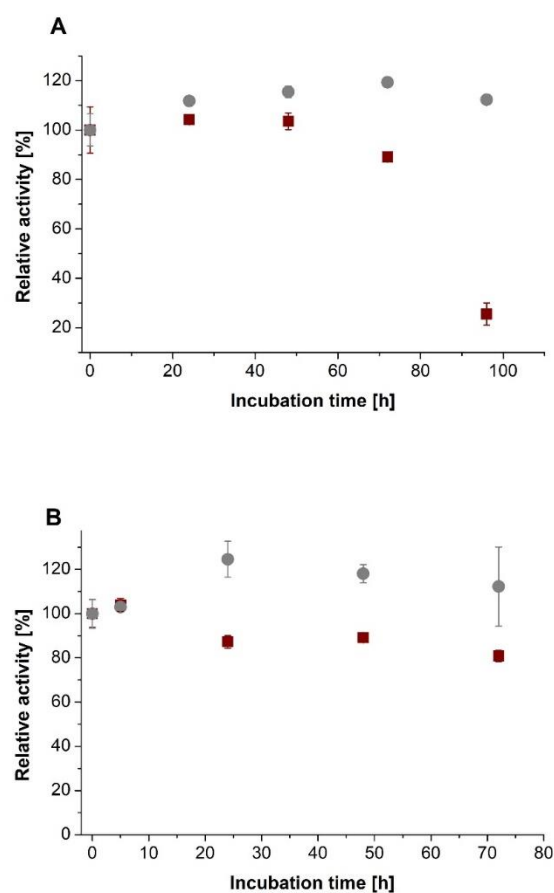

**Figure S1.** Long-term thermal stability of free (■) and immobilized (●) DAAO<sub>Rg</sub> (A) and TK<sub>gst</sub> (B); enzymes were incubated in H<sub>2</sub>O with cofactors -ThDP (0.1 mM) and MgCl<sub>2</sub> (1 mM) at 30 °C; 100% is the enzyme activity before incubation.

Reaction conditions for DAAO<sub>Rg</sub>: D-ser (50 mM) in Tris-HCl (0.5 M, pH7.5), DAAO<sub>Rg</sub> free or immobilized on amino-modified silica (0.01 mg), free catalase (0.1 mg), 26 °C, 500 rpm, O<sub>2</sub>.

Reaction conditions for TK<sub>gst</sub>: HPA (50 mM), GOA (50 mM), ThDP (0.1 mM), MgCl<sub>2</sub> (1 mM), TK<sub>gst</sub> free or immobilized on amino-modified silica (0.1 mg), pH 7.0, 50 °C, 500 rpm.
